# Supplementary material
Source: PubMed Central journal article supplement (PMC3334307)
Supplement: NIHMS177133-supplement-1_si_001.pdf [file NIHMS177133-supplement-1_si_001.pdf]

# Supporting Information

## Multiplexed DNA-Modified Electrodes

*Jason D. Slinker, Natalie B. Muren, Alon A. Gorodetsky and Jacqueline K. Barton*

Division of Chemistry and Chemical Engineering, California Institute of Technology, Pasadena,  
California, 91125

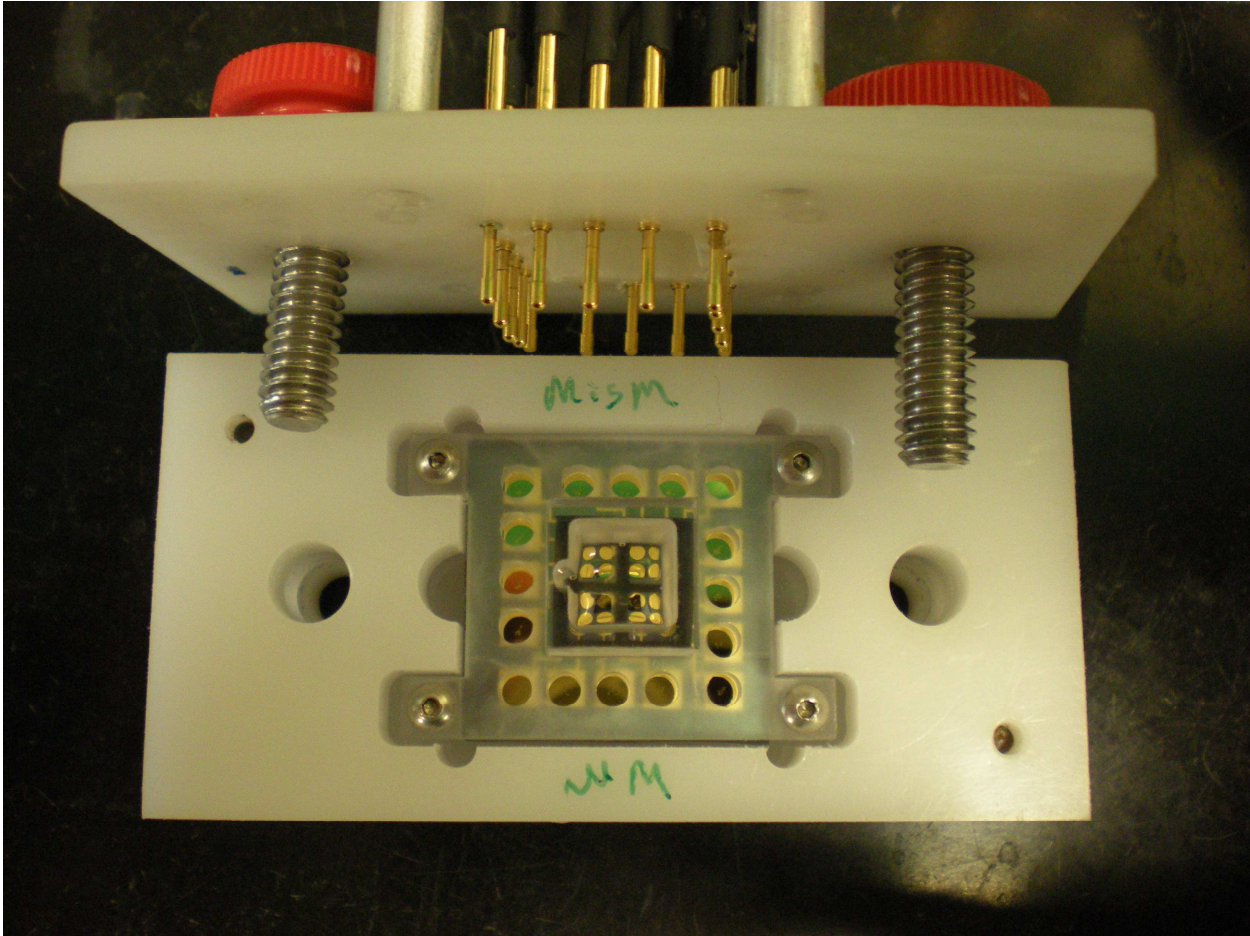

**Supporting Figure 1.** Close up picture of a DME chip with clamp well in the testing mount.

**Supporting Table 1.** DNA melting temperature data as obtained from UV-Vis spectrometry for the 17-mer sequences of Figure 2 of the main text.

| DNA target                  | $T_{M,actual}$ (°C) | $T_{M,calculated}$ (°C) <sup>a</sup> |
|-----------------------------|---------------------|--------------------------------------|
| Well Matched 3' Redmond Red | 56.2                | 54.8                                 |
| Well Matched 5' Nile Blue   | 55.1                | 54.8                                 |
| Mismatched 5' Nile Blue     | 43.4                | 47.0                                 |
| Well Matched No Probe       | 54.4                | 54.8                                 |

<sup>a</sup> Calculated values from Integrated DNA Technologies OligoAnalyzer software.

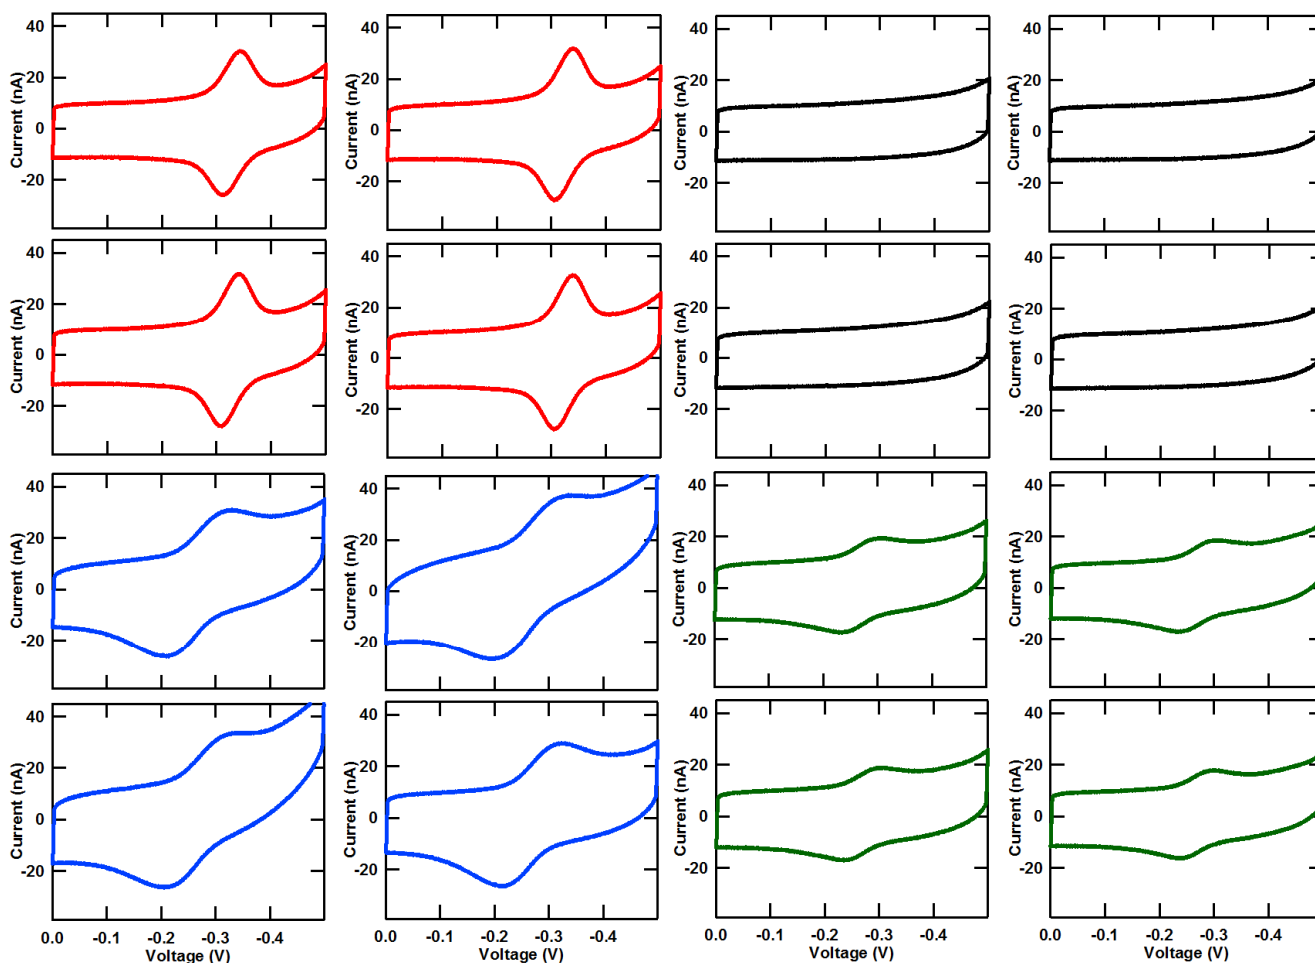

**Supporting Figure 2.** Cyclic voltammetry data showing all 16 electrode signals from the chip used in the experiment of Figure 2 of the main text. The chip was prepared with four different DNA sequences on four electrodes each. The four sequences consisted of (i) a well matched strand with a distal 5' Nile Blue redox probe (5'- $T_{NB}$ GC GTC TCA GCT GAA GT-3, blue), (ii) a well matched strand with a proximal 3' Redmond Red probe (5'-TGC GTC TCA GCT GAA GT(RR)-3', red), (iii) a well matched strand with no redox probe (5'-TGC GTC TCA GCT GAA GT-3', black), and (iv) a 5' Nile Blue-labeled strand containing a single base-pair (CA) mismatch (5'- $T_{NB}$ GC GTC TCA GCT AAA GT-3, green). ( $T_{NB}$  is a thymine modified with a Nile Blue redox probe, A notes the location of a single CA mismatch, and RR denotes a Redmond Red redox probe.) The potentials are reported versus Ag/AgCl with a CV scan rate of 100 mV/s.

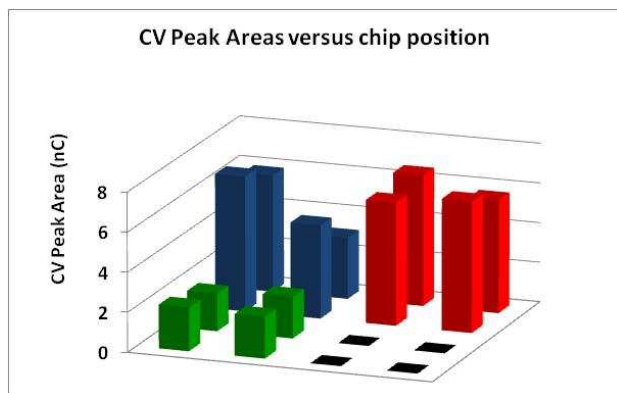

**Supporting Figure 3.** Integrated CV peak charge versus chip position for the chip used in the experiment of Figure 2 of the main text. The chip was prepared with four different DNA sequences on four electrodes each. The four sequences consisted of (i) a well matched strand with a distal 5' Nile Blue redox probe (5'- $T_{NB}$ GC GTC TCA GCT GAA GT-3, blue), (ii) a well matched strand with a proximal 3' Redmond Red probe (5'-TGC GTC TCA GCT GAA GT(RR)-3', red), (iii) a well matched strand with no redox probe (5'-TGC GTC TCA GCT GAA GT-3', black), and (iv) a 5' Nile Blue-labeled strand containing a single base-pair (CA) mismatch (5'- $T_{NB}$ GC GTC TCA GCT AAA GT-3, green). ( $T_{NB}$  is a thymine modified with a Nile Blue redox probe, A notes the location of a single CA mismatch, and RR denotes a Redmond Red redox probe.)

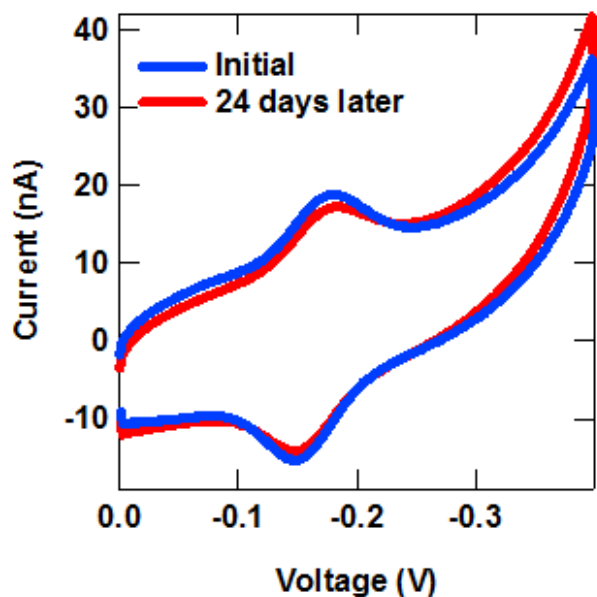

**Supporting Figure 4.** Cyclic voltammetry data of a chip measured initially (blue) and after 24 days of storage (red) at 4 °C. The DNA sequence was the well matched 17-mer 5'- $T_{\text{NB}}$ GC GTG CTT TAT ATC TC-3', where  $T_{\text{NB}}$  is a thymine modified with a Nile Blue redox probe. The curves are the average over all 16 electrodes on the chip. The potentials are reported versus Ag/AgCl with a CV scan rate of 50 mV/s.

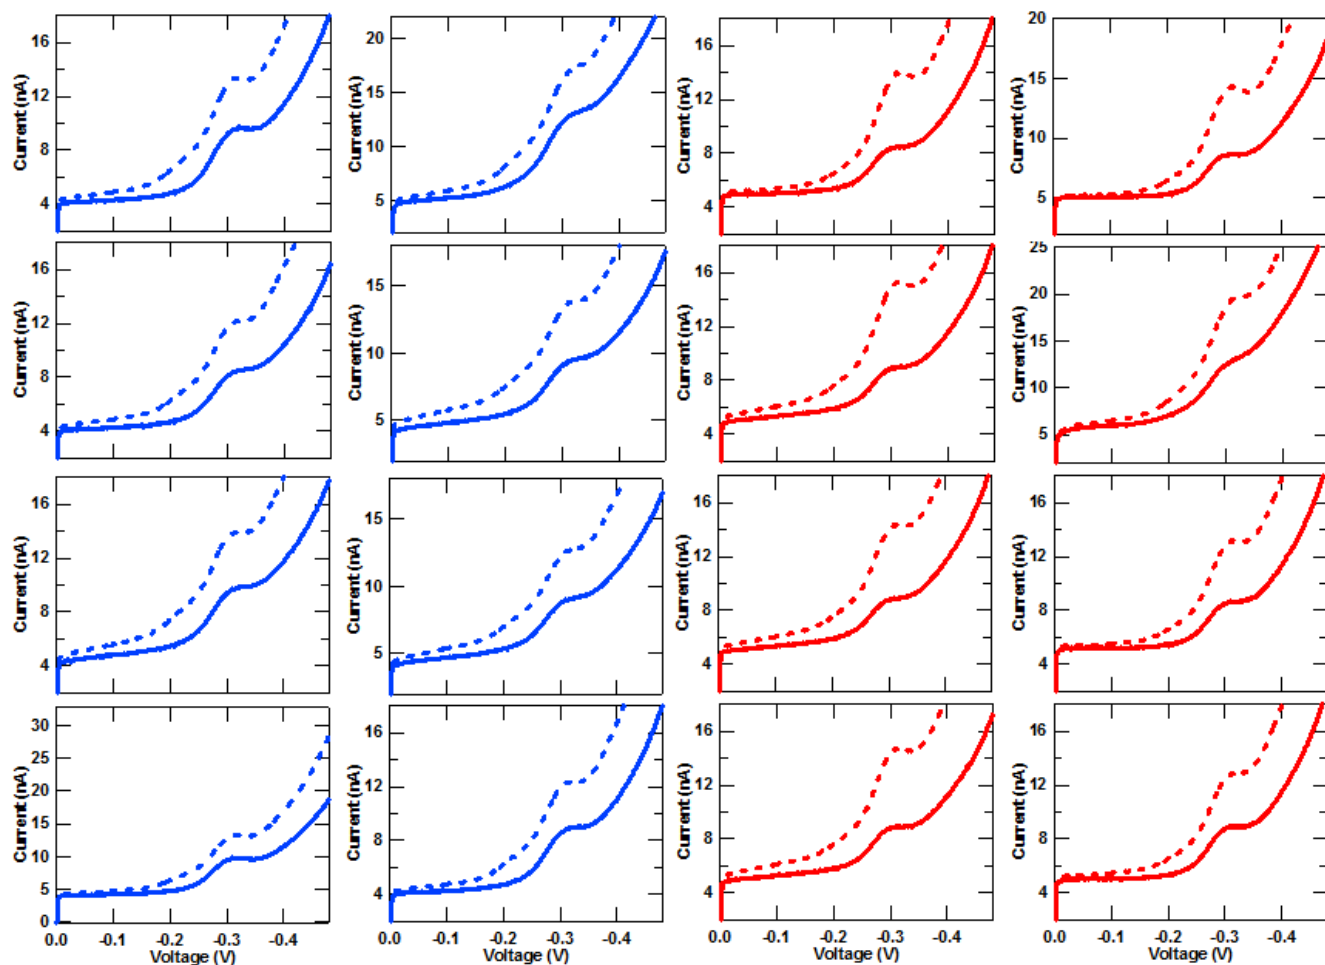

**Supporting Figure 5.** Cyclic voltammety data showing all 16 electrodes from the chip used in the *Alu1* experiment of Figure 3 of the main text. The data shown is for the cathodic sweep at 50 mV/s for initial (dotted lines) and at 1600 units *Alu1*/mL (solid lines) for DNA with (red) and without (blue) the restriction site.

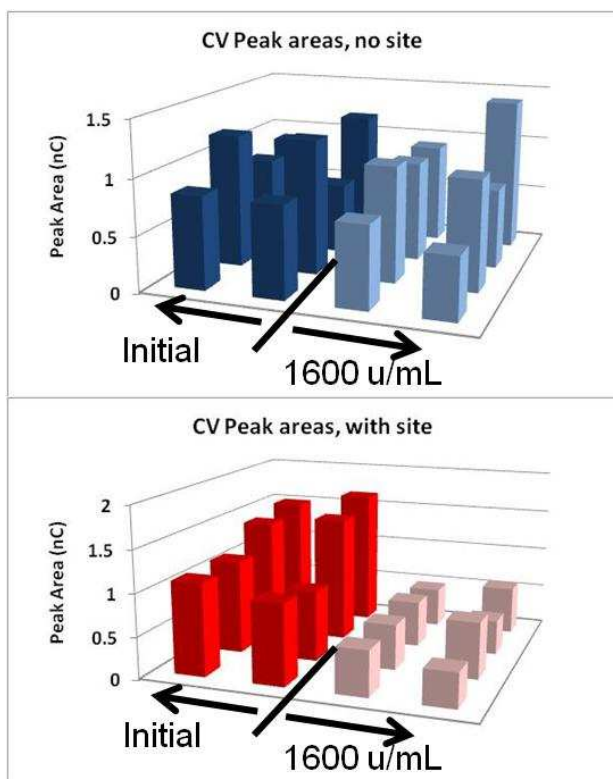

**Supporting Figure 6.** Integrated CV peak charge versus peak position for the chip used in the *Alu1* experiment of Figure 3 of the main text. (Top) Integrated peak areas for the 8 electrodes modified with DNA monolayers without the restriction site before (left) and after (right) addition of 1600 units/mL *Alu1*. (Bottom) Integrated peak areas for the 8 electrodes modified with DNA monolayers bearing the restriction site before (left) and after (right) addition of 1600 units/mL *Alu1*.



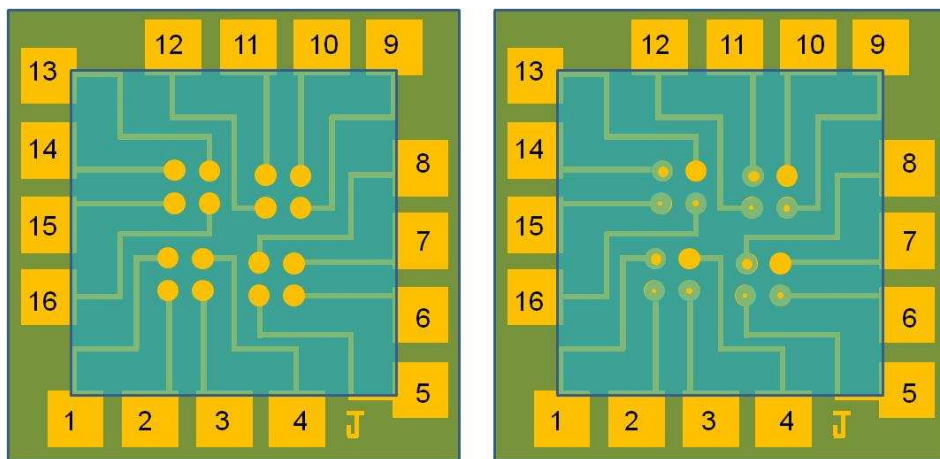

**Supporting Figure 7.** (Not to scale) Illustration of the layout for a macroelectrode (left) and a microelectrode (right) DME chip. To create microelectrodes, the SU-8 is extended to expose smaller areas of the gold working electrodes. We used this scheme to create reduced electrode diameters of 300, 56, and 10  $\mu\text{m}$ .
